# Supplementary material for: Autoinhibition of Munc18-1 modulates synaptobrevin binding and helps to enable Munc13-dependent regulation of membrane fusion
Source: eLife journal article supplement (doi:10.7554/elife.24278), 2017-05-06
Supplement: supp [file elife-24278-supp-v1.zip]

*Rattus norvegicus* Munc18-1 EVSQEVT<sup>\*</sup>RLSKDFSSSKRMNTGEK-TTMRDLSQMLKKMPQYQ<sup>\*</sup>KELSKYSTHLHLAEDCM  
*Homo sapiens* Munc18-1 EVSQEVT<sup>\*</sup>RLSKDFSSSKRMNTGEK-TTMRDLSQMLKKMPQYQ<sup>\*</sup>KELSKYSTHLHLAEDCM  
*Gallus gallus* Munc18-1 EVSQEVT<sup>\*</sup>RLSEKDFSSSKRMNTGDK-TTMRDLSQMLKKMPQYQ<sup>\*</sup>KELSKYSTHLHLAEDCM  
*Xenopus laevis* Munc18-1 EVSQEVT<sup>\*</sup>RLSKDFSSSKRMNTGDKVTTMRDLSQMLKKMPQYQ<sup>\*</sup>KELSKYSTHLHLAEDCM  
*Danio Rerio* Munc18-1 EVSQEVT<sup>\*</sup>RLSEKDFSSSKRMNTGEK-TTMRDLSQMLKKMPQYQ<sup>\*</sup>KELSKYSTHLQLAEDCM  
*Drosophila melanogaster* Rop VVSTQVTQNKKF<sup>\*</sup>FTSKRMGSAD-KSSMRDLSQMIKKMPQYQ<sup>\*</sup>KELSKYSTHLHLAEDCM  
*Caenorhabditis elegans* Unc18 VVSQEVTKNLKKF<sup>\*</sup>SESKGNKGTMD<sup>\*</sup>SKSIKDL<sup>\*</sup>SMLIKRMPQHKKELNKFSTHISLAEECM  
*Chaetomium thermophilum* Vps33 IVGSL<sup>\*</sup>LNTVARRL<sup>\*</sup>KSDY--ESRHNTKTTAELKEFVKKLPGYQAEQQSLKIHNSIAEEII<sup>\*</sup>
