# Supplementary figures and images for: Autoinhibition of Munc18-1 modulates synaptobrevin binding and helps to enable Munc13-dependent regulation of membrane fusion
Source: eLife journal article supplement (doi:10.7554/elife.24278), 2017-05-06

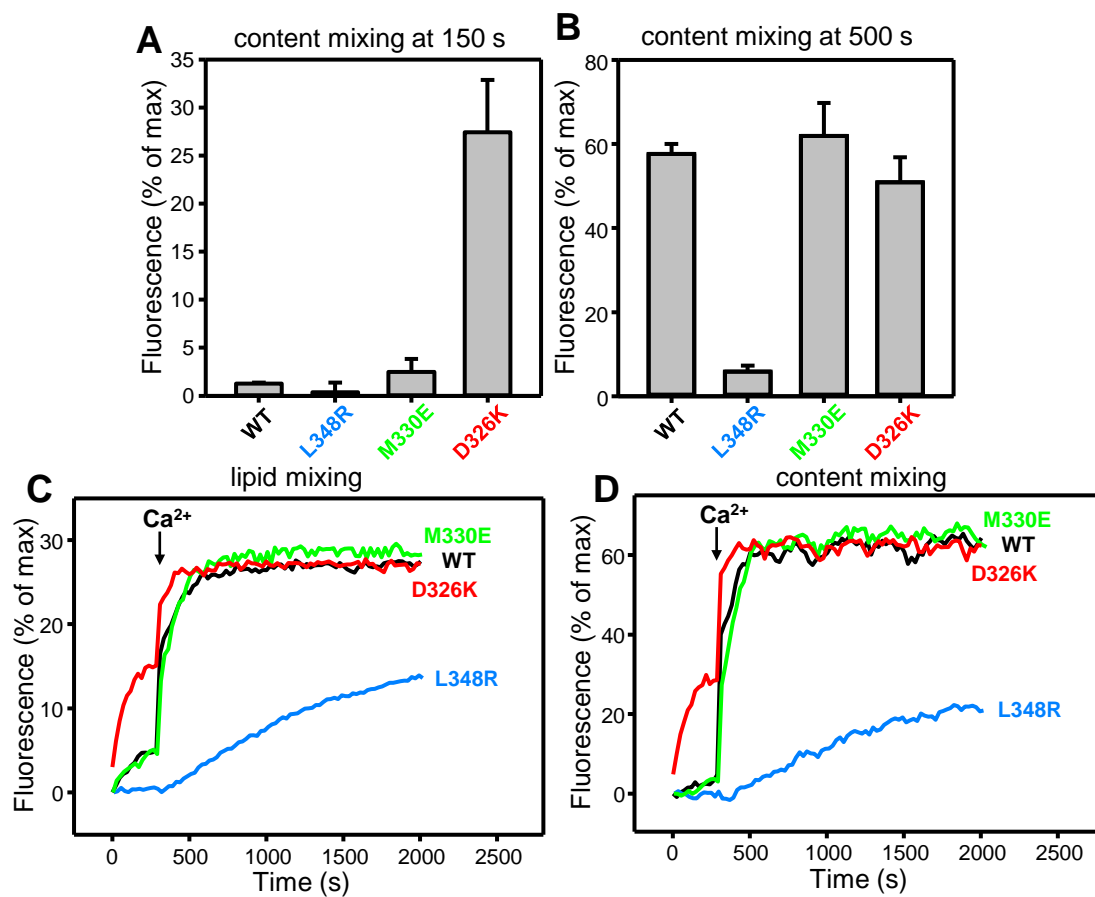

Figure 4 - Figure Supplement 1  
Sitarska et al.

Supplement: supp [file elife-24278-supp-v1.zip]

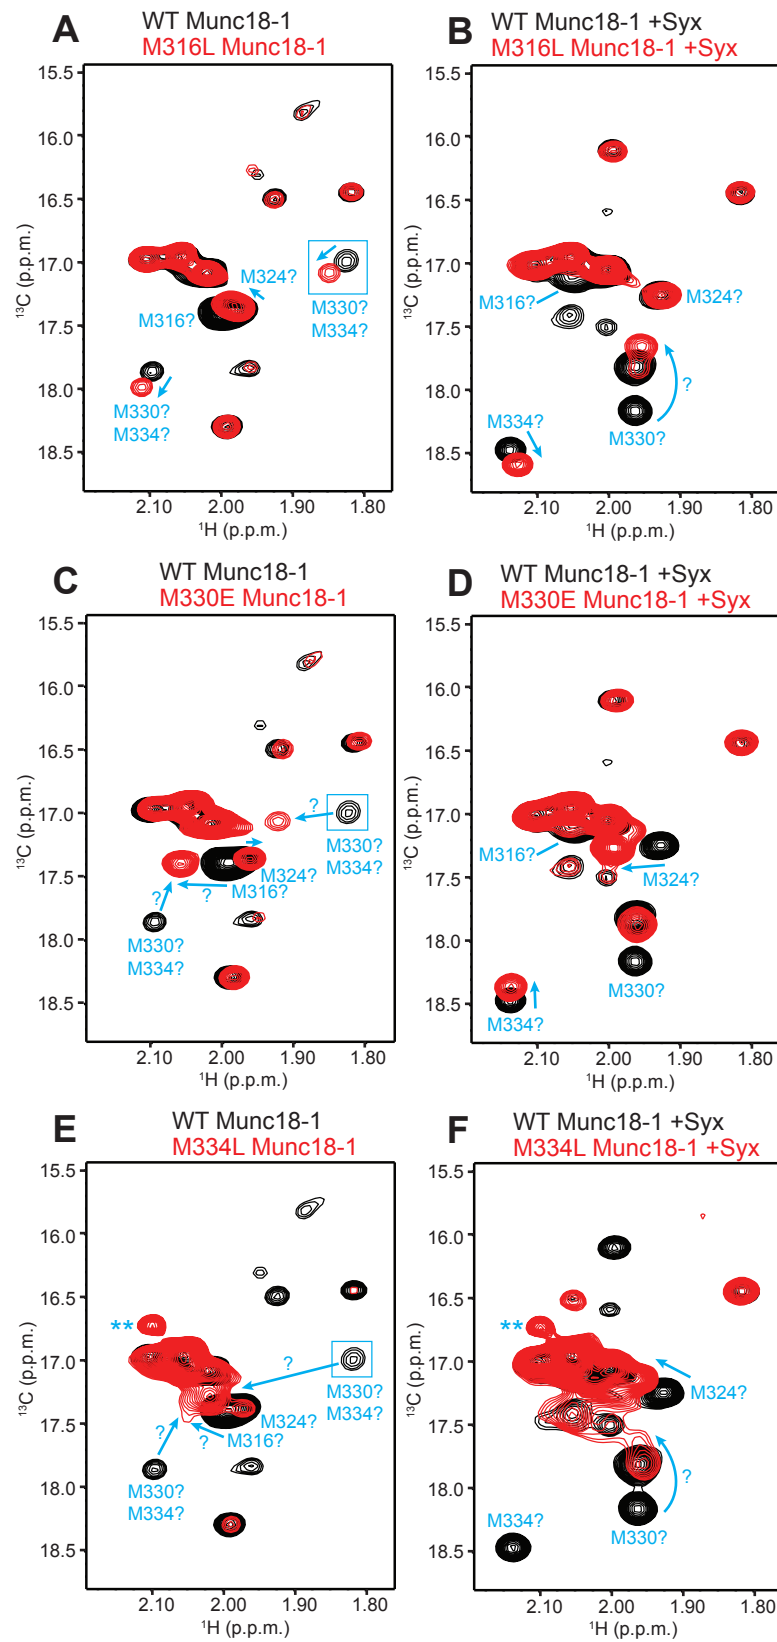

Figure 6 - figure supplement 2  
Sitarska et al.

Supplement: supp [file elife-24278-supp-v1.zip]

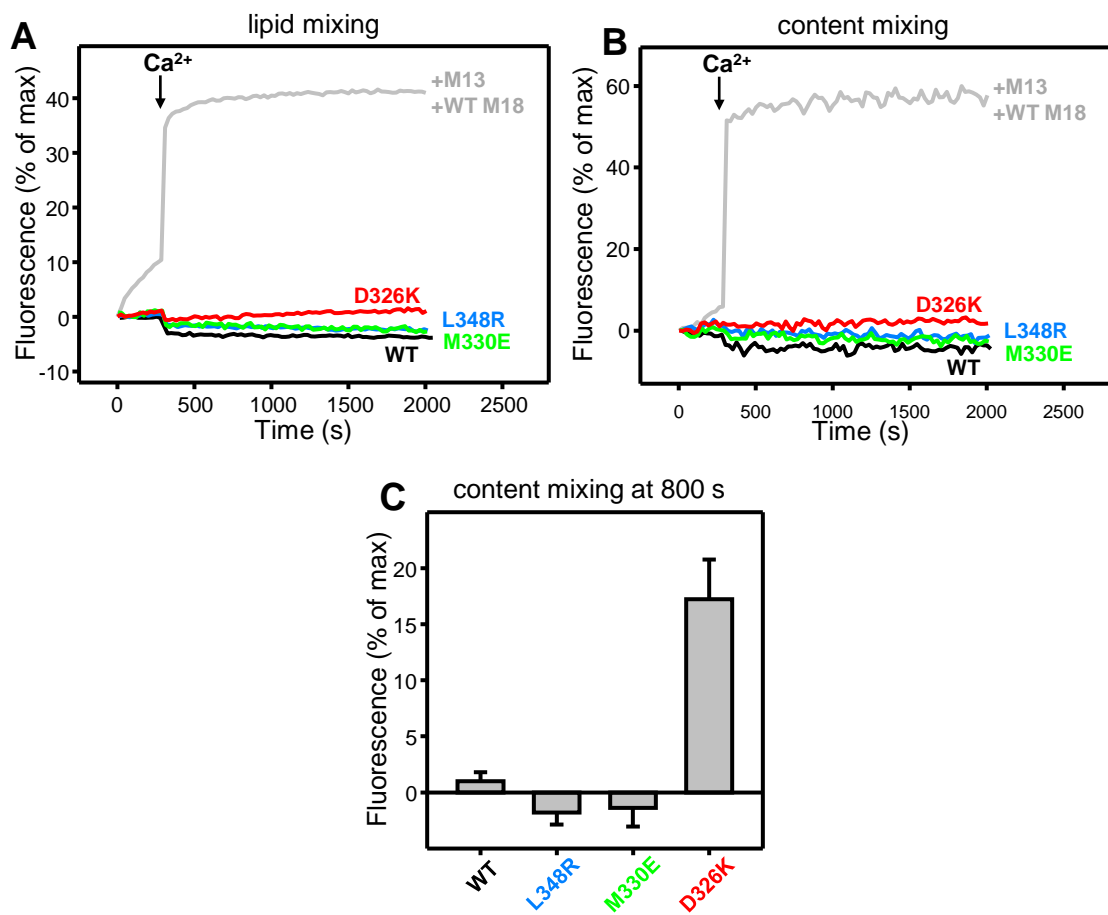

Figure 4 - Figure Supplement 2  
Sitarska et al.

Supplement: supp [file elife-24278-supp-v1.zip]

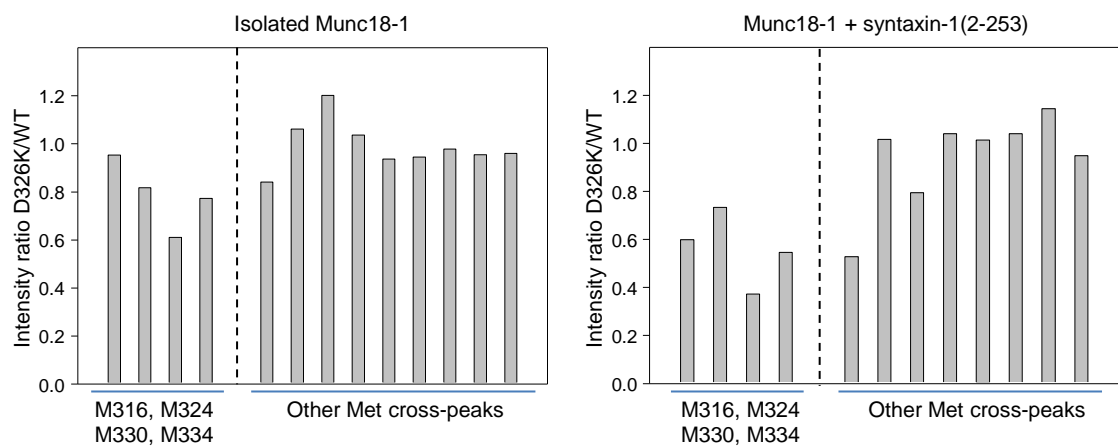

Figure 6 – figure supplement 3  
Sitarska et al.

Supplement: supp [file elife-24278-supp-v1.zip]

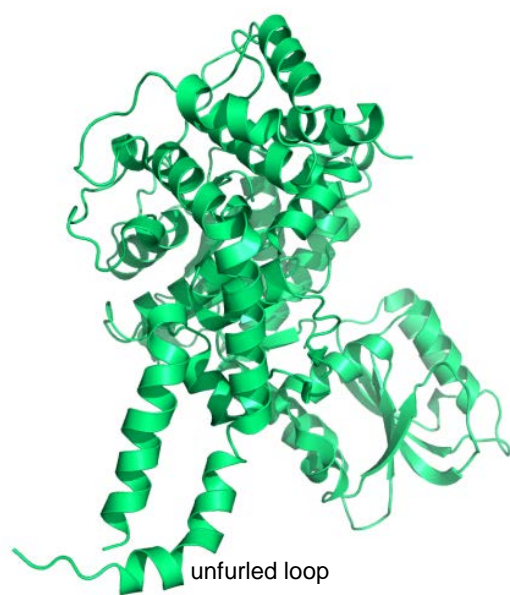

Figure 6 – figure supplement 1  
Sitarska et al.

Supplement: supp [file elife-24278-supp-v1.zip]

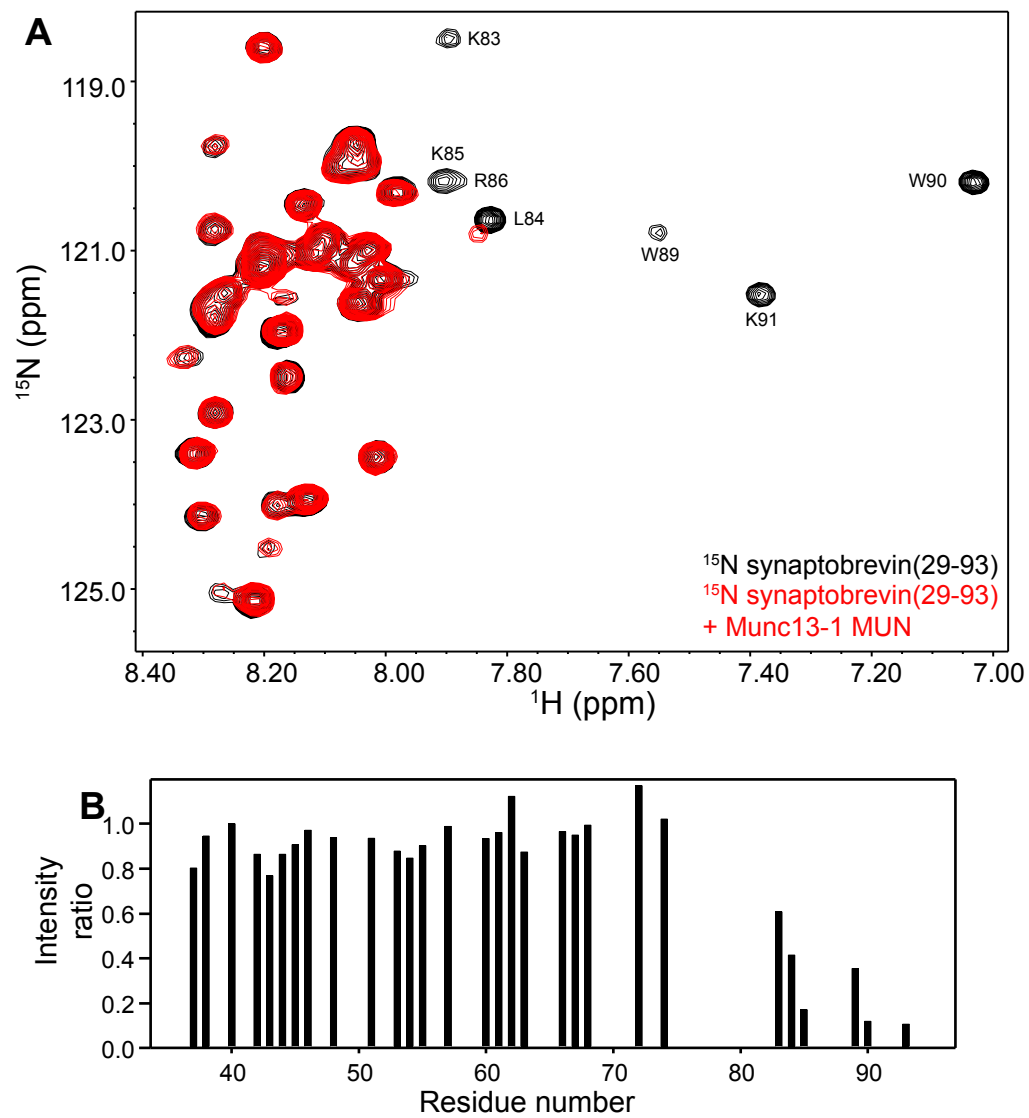

Figure 2 - figure supplement 1  
Sitarska et al.

Supplement: supp [file elife-24278-supp-v1.zip]

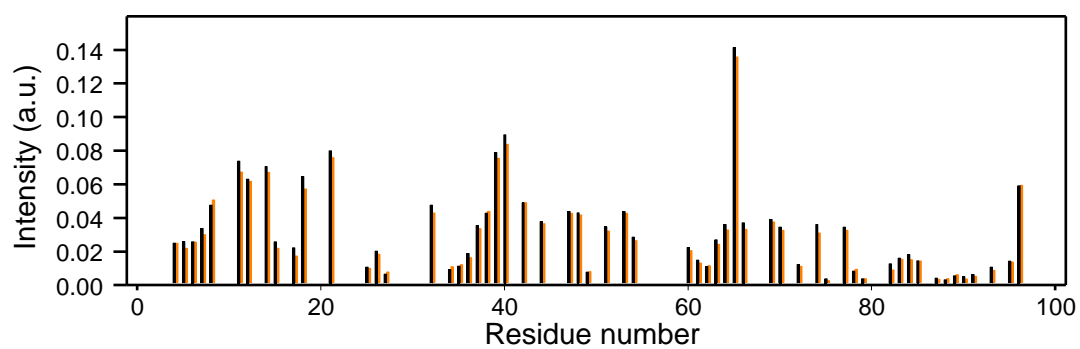

Figure 2 – figure supplement 2  
Sitarska et al.

Supplement: supp [file elife-24278-supp-v1.zip]

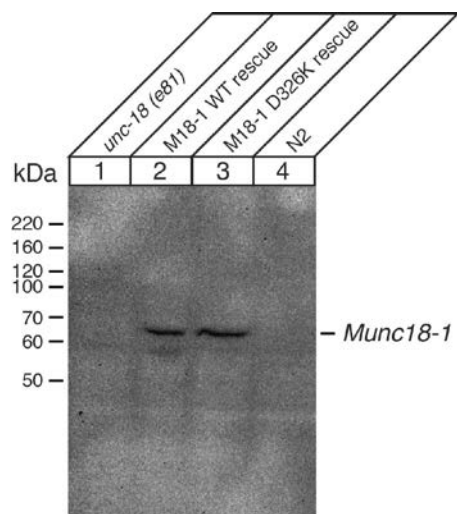

Figure 7 – figure supplement 1  
Sitarska et al.

Supplement: supp [file elife-24278-supp-v1.zip]
